# Supplementary material
Source: PubMed Central journal article supplement (PMC2761374)
Supplement: 0907564106_0907564106SI.pdf [file 0907564106_0907564106SI.pdf]

# Supporting Information

Jiao et al. 10.1073/pnas.0907564106

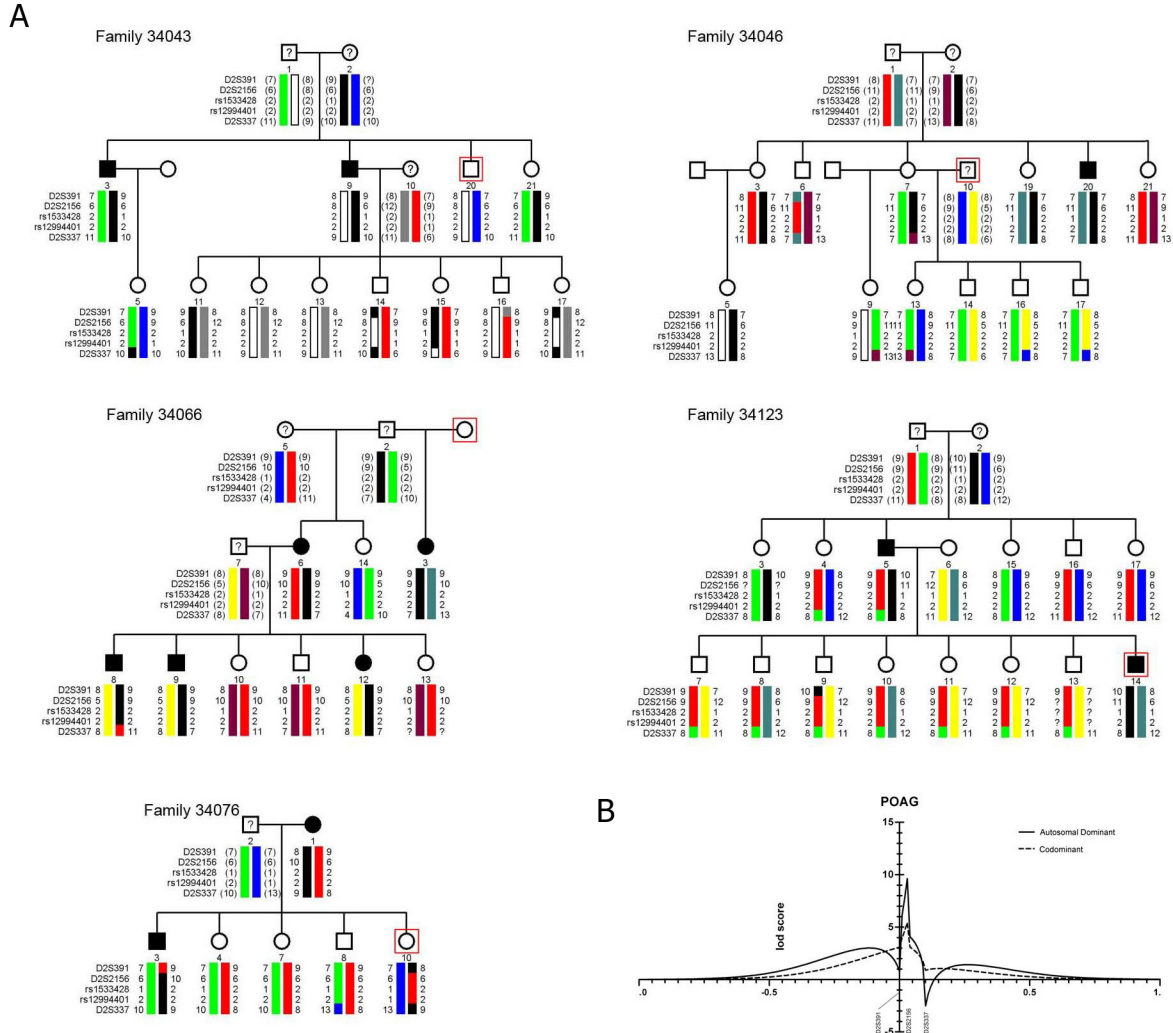

**Fig. S1.** (A) Pedigrees of the 5 families giving  $P > 95\%$  for being linked to D2S2156 under the autosomal dominant and codominant models. Circles represent females, squares represent males, and filled individuals are affected with POAG. Haplotypes are shown for the 6 markers included in Table 1. (B) Multipoint linkage analysis of families with  $P > 0.95$  of being linked with chromosome 2 markers in the region around D2S2156 (Table 1). Solid line: multipoint LOD score obtained from 5 linked families with the autosomal dominant model; dashed line: multipoint LOD score obtained from 5 linked families with the codominant model. Locations are shown on the x axis with D2S391 at the origin and D2S2156, rs1533428, and rs12994401 localized together (0 cM).

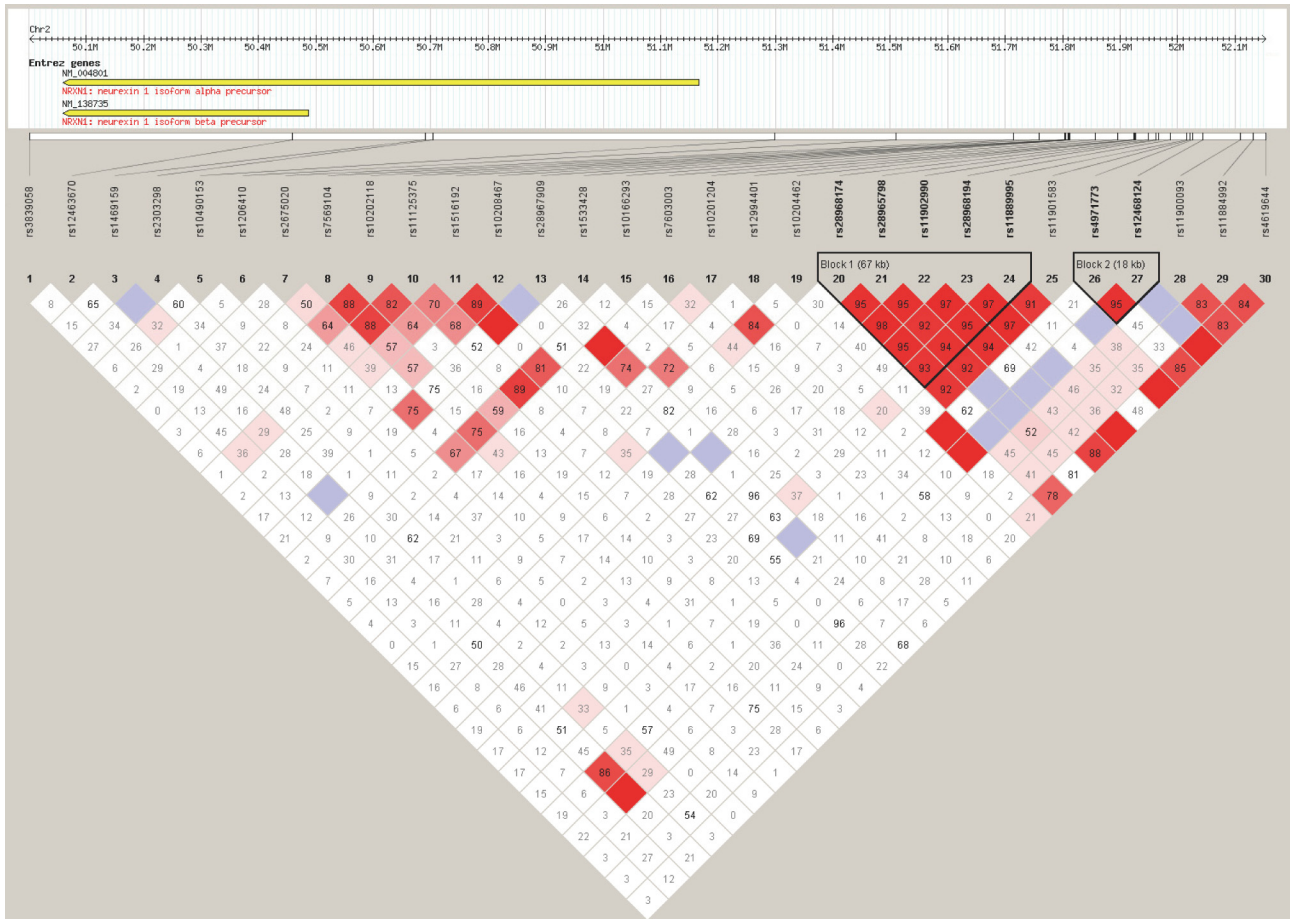

**Fig. S2.** The pairwise  $D'$  Hapview plot for SNPs in Chromosome 2 using these BFGS samples. The pairwise  $D'$  Hapview plot was generated for 30 SNPs in the region based on combined cases-control data for POAG.

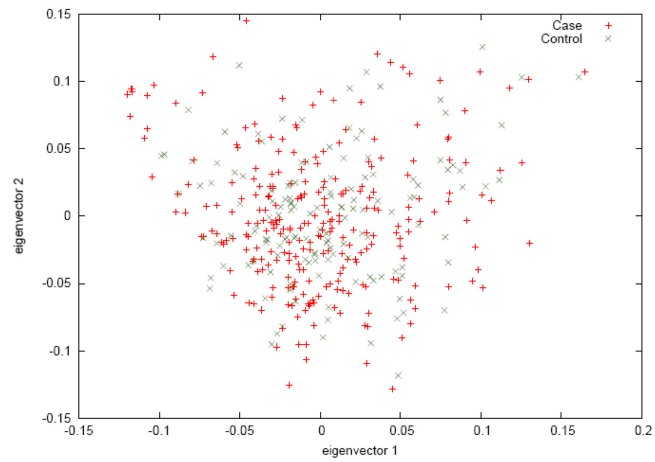

**Fig. S3.** Analysis of stratification in all (discovery plus replication) POAG cases and controls from BFG. Stratification between cases and controls was assessed with 28 AIMS typed in 252 cases and 130 controls. Eigenvector 1 (x axis) and Eigenvector 2 (y axis) represent the two most important principal components. Red pluses represent cases and the gray xs represent controls.

**Table S1. Top 5 families for autosomal recessive dominant and codominant models**

| Marker                   | bp         | cM   | 0     | 0.01  | 0.05  | 0.1   | 0.2   | 0.3   | 0.4   | $Z_{\max}$ | $\theta_{\max}$ |
|--------------------------|------------|------|-------|-------|-------|-------|-------|-------|-------|------------|-----------------|
| Codominant model         |            |      |       |       |       |       |       |       |       |            |                 |
| D2S391*                  | 46,265,004 | 73.8 | -0.27 | -0.22 | -0.07 | 0.03  | 0.08  | 0.06  | 0.02  | 0.09       | 0.22            |
| D2S2156                  | 51,111,121 | 77.1 | 5.27  | 5.14  | 4.62  | 3.96  | 2.61  | 1.32  | 0.34  | 5.27       | 0               |
| rs1533428                | 51,870,909 |      | 2.40  | 2.33  | 2.08  | 1.76  | 1.13  | 0.56  | 0.15  | 2.40       | 0               |
| rs12994401               | 51,983,897 |      | 0.30  | 0.29  | 0.26  | 0.23  | 0.15  | 0.07  | 0.02  | 0.30       | 0               |
| D2S337*                  | 61,523,435 | 84.1 | -0.21 | -0.05 | 0.22  | 0.31  | 0.28  | 0.15  | 0.04  | 0.31       | 0.11            |
| Autosomal dominant model |            |      |       |       |       |       |       |       |       |            |                 |
| D2S391*                  | 46,265,004 | 73.8 | -5.85 | -4.69 | -2.70 | -1.54 | -0.49 | -0.11 | -0.01 | 0.00       | 0.5             |
| D2S2156                  | 51,111,121 | 77.1 | 9.91  | 9.73  | 8.97  | 7.97  | 5.80  | 3.42  | 1.07  | 9.91       | 0               |
| rs1533428                | 51,870,909 |      | 2.39  | 2.44  | 2.47  | 2.35  | 1.80  | 1.04  | 0.30  | 2.48       | 0.04            |
| rs12994401               | 51,983,897 |      | -0.31 | -0.24 | -0.06 | 0.04  | 0.09  | 0.07  | 0.02  | 0.10       | 0.25            |
| D2S337*                  | 61,523,435 | 84.1 | -3.03 | -2.53 | -1.08 | -0.28 | 0.24  | 0.25  | 0.09  | 0.25       | 0.3             |

\*Used in initial genome wide scan (1).

1. Nemesure B, et al. (2003) A genome-wide scan for primary open-angle glaucoma (POAG): The Barbados Family Study of Open-Angle Glaucoma. *Hum Genet* 112(5-6):600-609.

**Table S2. Genotype and association results of rs1533428 and rs12994401 from POAG cases and controls**

| Snps                            | rs1533428       |          |                   |          |                |           | rs12994401      |          |                   |          |                |           |
|---------------------------------|-----------------|----------|-------------------|----------|----------------|-----------|-----------------|----------|-------------------|----------|----------------|-----------|
|                                 | Discovery group |          | Replication group |          | Combined group |           | Discovery group |          | Replication group |          | Combined group |           |
|                                 | Case            | Control  | Case              | Control  | Case           | Control   | Case            | Control  | Case              | Control  | Case           | Control   |
| Phenotype                       | (n = 127)       | (n = 64) | (n = 116)         | (n = 65) | (n = 243)      | (n = 129) | (n = 127)       | (n = 64) | (n = 122)         | (n = 64) | (n = 249)      | (n = 128) |
| TT genotype (n)                 | 55              | 7        | 52                | 8        | 107            | 15        | 46              | 1        | 42                | 1        | 88             | 2         |
| CT genotype (n)                 | 40              | 25       | 30                | 27       | 70             | 52        | 13              | 14       | 17                | 8        | 30             | 22        |
| CC genotype (n)                 | 32              | 32       | 34                | 30       | 66             | 62        | 68              | 49       | 63                | 55       | 131            | 104       |
| Risk allele (T)<br>frequency, % | 59.06           | 30.47    | 57.76             | 33.08    | 58.44          | 31.78     | 41.34           | 12.50    | 41.39             | 7.81     | 41.37          | 10.16     |
| Genotypic <i>P</i> values       | 1.46E-05        |          | 4.81E-05          |          | 1.20E-09       |           | 6.37E-07        |          | 1.09E-06          |          | 2.87E-12       |           |
| Trend <i>P</i> values           | 4.38E-06        |          | 1.18E-04          |          | 2.37E-09       |           | 9.83E-06        |          | 2.10E-07          |          | 1.11E-11       |           |
| Allelic <i>P</i> values         | 1.33E-07        |          | 6.58E-06          |          | 4.48E-12       |           | 1.07E-08        |          | 1.76E-11          |          | 1.46E-18       |           |
| Recessive <i>P</i> values       | 6.49E-06        |          | 8.25E-06          |          | 2.35E-10       |           | 1.53E-07        |          | 4.40E-07          |          | 3.21E-13       |           |
| Dominant <i>P</i> values        | 6.08E-04        |          | 0.023             |          | 5.37E-05       |           | 2.05E-03        |          | 3.95E-06          |          | 5.49E-08       |           |
| HWE <i>P</i> values             | 8.50E-05        | 5.32E-01 | 4.15E-07          | 6.19E-01 | 2.42E-10       | 4.24E-01  | 6.06E-19        | 1.00E+00 | 3.46E-15          | 2.90E-01 | 1.90E-32       | 5.10E-01  |

Table S3. Association results SNPs in chromosome 2p based on all (combined discovery and replication groups) cases and controls

| SNPs       | Risk allele | N    |         | Risk allele frequency, % |         | P        |                       |
|------------|-------------|------|---------|--------------------------|---------|----------|-----------------------|
|            |             | POAG | Control | POAG                     | Control | Allelic  | Bonferroni correction |
| rs10202118 | C           | 240  | 123     | 68.90                    | 52.31   | 1.23E-05 | 3.69E-04              |
| rs11125375 | G           | 242  | 123     | 60.33                    | 48.37   | 2.09E-03 | 6.27E-02              |
| rs10208467 | G           | 246  | 124     | 86.79                    | 79.84   | 1.38E-02 | 4.14E-01              |
| rs7603003  | A           | 239  | 124     | 60.11                    | 54.32   | 1.34E-01 | 4.02                  |
| rs2303298  | A           | 249  | 127     | 6.02                     | 2.36    | 2.60E-02 | 7.80E-01              |
| rs12463670 | T           | 246  | 124     | 20.12                    | 14.11   | 4.51E-02 | 1.35                  |
| rs1469159  | A           | 249  | 128     | 83.53                    | 82.81   | 8.01E-01 | 2.40E + 01            |
| rs10490153 | T           | 243  | 130     | 75.51                    | 73.85   | 6.16E-01 | 1.85E + 01            |
| rs1206410  | G           | 246  | 128     | 87.4                     | 83.98   | 1.99E-01 | 5.97                  |
| rs2675020  | G           | 246  | 128     | 53.05                    | 49.61   | 3.72E-01 | 1.12E + 01            |
| rs7569104  | A           | 241  | 124     | 26.97                    | 25.58   | 6.49E-01 | 1.95E + 01            |
| rs1516192  | T           | 241  | 124     | 45.02                    | 38.71   | 1.03E-01 | 3.09                  |
| rs28967909 | G           | 239  | 126     | 96.82                    | 96.83   | 9.79E-01 | 2.94E + 01            |
| rs10166293 | G           | 248  | 126     | 76.41                    | 75.79   | 8.51E-01 | 2.55E + 01            |
| rs10201204 | G           | 244  | 126     | 43.85                    | 40.48   | 3.79E-01 | 1.14E + 01            |
| rs10204462 | G           | 246  | 124     | 26.63                    | 21.77   | 1.50E-01 | 4.50                  |
| rs11889995 | A           | 242  | 123     | 17.15                    | 9.45    | 4.70E-03 | 1.41E-01              |
| rs4619644  | T           | 251  | 128     | 66.73                    | 61.33   | 1.40E-01 | 4.20                  |
| rs11900093 | G           | 239  | 128     | 8.59                     | 7.03    | 4.63E-01 | 1.39E + 01            |
| rs11884992 | T           | 249  | 124     | 7.63                     | 6.88    | 7.03E-01 | 2.11E + 01            |
| rs28968194 | A           | 240  | 123     | 93.23                    | 91.41   | 3.59E-01 | 1.08E + 01            |
| rs4971773  | C           | 239  | 124     | 12.24                    | 8.76    | 1.59E-01 | 4.77                  |
| rs28965798 | C           | 246  | 124     | 94.51                    | 93.15   | 4.58E-01 | 1.37E + 01            |
| rs11902990 | T           | 244  | 127     | 93.03                    | 91.73   | 5.21E-01 | 1.56E + 01            |
| rs12468124 | G           | 248  | 128     | 11.49                    | 8.2     | 1.61E-01 | 4.83                  |
| rs11901583 | A           | 241  | 128     | 92.95                    | 92.58   | 8.54E-01 | 2.56E + 01            |
| rs28968174 | T           | 244  | 124     | 93.24                    | 91.94   | 5.18E-01 | 1.55E + 01            |
| rs3839058  | T           | 241  | 124     | 46.68                    | 45.56   | 7.75E-01 | 2.33E + 01            |

**Table S4. Male and female specific penetrances for the codominant model (derived assuming  $\alpha = 0.181$ )**

| Liability class | Gender |      | Penetrance |      |
|-----------------|--------|------|------------|------|
| Unaffected      | Male   | 0.01 | 0.54       | 0.99 |
|                 | Female | 0.01 | 0.27       | 0.98 |
| POAG            | Male   | 0.01 | 0.54       | 0.99 |
|                 | Female | 0.01 | 0.27       | 0.98 |
| GS-1            | Male   | 0.01 | 0.4        | 0.74 |
|                 | Female | 0.01 | 0.2        | 0.74 |
| GS-2            | Male   | 0.01 | 0.27       | 0.49 |
|                 | Female | 0.01 | 0.14       | 0.49 |

**Table S5. Diagnostic criteria for POAG; ++, most complete classification data; +, less complete but sufficient for classification**

| Diagnostic test            | Criteria                                                                                                                                                                                                                                                                                                                                                                                                                                                                  |
|----------------------------|---------------------------------------------------------------------------------------------------------------------------------------------------------------------------------------------------------------------------------------------------------------------------------------------------------------------------------------------------------------------------------------------------------------------------------------------------------------------------|
| Visual field               |                                                                                                                                                                                                                                                                                                                                                                                                                                                                           |
| ++                         | At least two abnormal visual field tests by Humphrey automated perimetry, as defined by computer-based objective criteria, i.e., positive results of hemimeridional analyses of threshold tests (C24-2 or C30-2 full-threshold program) and/or the presence of one or more absolute defects in the central 30 degrees (as tested with the C64 suprathreshold program; 3-zone strategy), with ophthalmologic interpretation as definite or suspect glaucomatous field loss |
| +                          | Less than two abnormal visual field tests or an inability to perform reliable automated perimetry (because of severe visual impairment or infirmity), with ophthalmologic interpretation as definite glaucomatous field loss                                                                                                                                                                                                                                              |
| Optic disc                 |                                                                                                                                                                                                                                                                                                                                                                                                                                                                           |
| ++                         | At least two signs of optic disc damage present in fundus photographs and/or the ophthalmologic evaluation, including either a horizontal or vertical cup-disc ratio $\geq 0.7$ , narrowest remaining neuroretinal rim $\leq 0.1$ disc diameters, notching, asymmetry in cup-disc ratios between eyes $> 0.2$ , or disc hemorrhages                                                                                                                                       |
| +                          | Less than two signs of optic disc damage as described above (or unavailable photographs), with an ophthalmologic assessment or clinical record documenting definite glaucomatous optic nerve damage                                                                                                                                                                                                                                                                       |
| Ophthalmologic examination |                                                                                                                                                                                                                                                                                                                                                                                                                                                                           |
| ++                         | Clinical diagnosis of definite POAG after examination by the study ophthalmologist to exclude other possible causes for disc and field changes                                                                                                                                                                                                                                                                                                                            |
| +                          | Previous POAG history and treatment and/or visual field and disc damage, although a definite POAG diagnosis was not made at the time of the BFGS visit (e.g., because of inconclusive or incomplete data); the study ophthalmologist confirmed the diagnosis through record review or rE-examination                                                                                                                                                                      |

Those with POAG had a minimum of at least one plus (+) sign in each of the three categories.



**Table S6. Age and IOP by GROUP**

| Group                                   | Variable | N   | Mean | Std Dev | Minimum | Maximum |
|-----------------------------------------|----------|-----|------|---------|---------|---------|
| Affected with positive family history   | AGE      | 218 | 70.2 | 12.0    | 27.0    | 91.0    |
|                                         | IOP      | 218 | 26.2 | 9.2     | 9.7     | 80.3    |
| Unaffected with positive family history | AGE      | 36  | 62.8 | 10.8    | 35.0    | 85.0    |
|                                         | IOP      | 37  | 17.0 | 3.7     | 11.3    | 27.3    |
| Affected with negative family history   | AGE      | 51  | 74.6 | 10.0    | 49.0    | 93.0    |
|                                         | IOP      | 51  | 29.0 | 11.2    | 14.7    | 81.0    |
| Unaffected with negative family history | AGE      | 129 | 60.8 | 9.2     | 48.0    | 91.0    |
|                                         | IOP      | 129 | 20.0 | 3.5     | 13.7    | 34.7    |
